# Supplementary material for: Peripubertal Testosterone, 17β-Estradiol and Progesterone Concentrations in Hair and Nails in Dobermann Dogs
Source: MDPI journal article supplement (doi:10.3390/ani13132241), 2023-07-07
Supplement: s1 [file s1]

**Table S1.** Body Weight (kg) from 3 to 15 months of age in the 5 male and 5 female Doberman dogs enrolled in the present study

[illegible]
